# Supplementary material
Source: publisher figshare collection journal article supplement (https://sage.figshare.com/ndownloader/files/12394748)
Supplement: Supplementary file 1 [file 12394748]

## Appendix 1: Survey Questions

For the purpose of this survey, natural health products are vitamins, minerals, herbal remedies, homeopathic remedies, traditional Chinese medicines, or other supplements.

Rate questions 1–7 using the following 5-point Likert agreement scale: strongly agree, agree, neither agree nor disagree, disagree, strongly disagree.

- 1.** *Natural health products are safer than prescription medications*
- 2.** *Prescription medications are more effective than natural health products*
- 3.** *In general, natural health products are of good quality*
- 4.** *Natural health products generally do not have side effects*
- 5.** *Doctors, nurses, and pharmacists should recommend natural health products more often*
- 6.** *For a chronic medical condition (e.g., high blood pressure, diabetes, high cholesterol), I would prefer to take a natural health product rather than a prescription medication*
- 7.** *For a minor ailment (e.g., cough due to a cold, indigestion, aches and pains), I would prefer to take a natural health product rather than a prescription medication*
- 8.** *Do you take any non-prescription, over-the-counter natural health products such as vitamins, minerals, herbal remedies, homeopathic remedies, traditional Chinese medicines, or other supplements? If yes, go to question 9. If no, go to question 14.*
- 9.** *Do you take any of the following vitamins or minerals? Please circle all that apply.*  
 Calcium (any type)  
 Chromium  
 Iron (also known as ferrous fumarate, ferrous gluconate, ferrous sulfate, Palafer®)  
 Magnesium  
 Multivitamin (for example, Centrum®, Vitalux®)  
 Vitamin A  
 Vitamin B (for example, niacin, B6, B12, B50, B complex)  
 Vitamin C (also known as ascorbic acid)  
 Vitamin D  
 Vitamin E  
 Zinc  
 Other (please specify)\_\_\_\_\_

- 10.** *Do you take any of the following natural remedies/supplements? Please circle all that apply.*  
 Coenzyme Q10  
 Cold-fx® (also known as North American ginseng)  
 Echinacea  
 Fish oils (also known as omega-3 fatty acids)  
 Garlic  
 Ginkgo biloba  
 Glucosamine and/or chondroitin  
 Grapeseed extract  
 L-carnitine  
 Lecithin  
 Melatonin  
 MSM (also known as methylsulfonylmethane)  
 Probiotic (e.g., acidophilus)  
 Red yeast rice  
 Saw palmetto  
 Selenium  
 St. John's wort  
 Valerian  
 Other (please specify)\_\_\_\_\_
- 11.** *Where do you buy your natural health products? Please circle all that apply.*  
 Retail pharmacy (e.g., London Drugs, Pharmasave, Rexall, Shoppers Drug Mart)  
 Grocery store (e.g., Safeway, Save-on-Foods)  
 Large format store (e.g., Costco, The Real Canadian Superstore, Walmart)  
 Health food or vitamin store  
 Internet  
 Other (please specify)\_\_\_\_\_

**12. Where do you get information about natural health products? Please circle all that apply.**

Pharmacist

Doctor

Naturopath

The Internet

Books, magazines or newspapers

Friends and family

Other (please specify)\_\_\_\_\_

**13. Approximately how much money do you spend on natural health products every month? Please circle the BEST answer.**

Less than \$25

Between \$25 and \$50

Between \$50 and \$75

Between \$75 and \$100

Over \$100

**14. What is your age?**

Under 20

20-39

40-59

60-79

80 or over

**15. What is your sex?**

Female

Male

**16. What is your highest level of education? Please circle the BEST answer.**

Primary or middle school

High school

Trade school

University or college

**17. What is your marital status? Please circle the BEST answer.**

Single

Married/common law

Separated/widow

**18. What is your ethnicity? Please circle the BEST answer.**

Asian

Black

Filipino

First Nations

Latin American

Middle Eastern

South Asian

White

Other (please specify)\_\_\_\_\_
